# Supplementary material for: Fertilization Modes And The Evolution of Sperm Characteristics In Marine Fishes: Paired Comparisons of The Externally And Internally Fertilizing Species
Source: Research Square preprint supplement (doi:10.21203/rs.3.rs-528835/v1), 2021-06-02
Supplement: Supplementary file 2 [file 6e4d25dae7fd723da8201468.docx]

**Additional file 6: Table S6** Summary of sperm characteristics in Group III.

**Table S6** Summary of sperm characteristics in Group III.

| Sperm characteristics | *Aulorhynchus flavidus* | *Hypoptychus dybowskii* | *Aulichthys japonicus* | Statistics | |
| --- | --- | --- | --- | --- | --- |
| χ22 | P |
| Total length (μm) | 34.27a (1, 14) | 39.98 ± 0.48b (4, 58) | 37.66 ± 0.77c (7, 174) | 24.54 | < 0.0001 |
| Flagellum length (μm) | 31.63a (1, 14) | 37.77 ± 0.54b (4, 55) | 35.28 ± 0.67c (7, 168) | 27.78 | < 0.0001 |
| Head length (μm) | 2.64a (1, 14) | 2.24 ± 0.15b (4, 58) | 2.39 ± 0.16ab (7, 176) | 6.36 | 0.042 |
| Head width (μm) | 2.10a (1, 14) | 1.16 ± 0.08b (4, 59) | 1.17 ± 0.05b (7, 180) | 38.94 | < 0.0001 |
| Midpiece length (μm) | 1.07a (1, 14) | 0.61 ± 0.07b (4, 60) | 1.59 ± 0.35a (7, 176) | 19.36 | < 0.0001 |
| Midpiece width (μm) | 1.27a (1, 14) | 1.01 ± 0.08b (4, 59) | 1.17 ± 0.11a (7, 171) | 9.93 | 0.007 |
| Head length / head width | 1.27a (1, 14) | 1.96 ± 0.15b (4, 55) | 2.06 ± 0.14b (7, 174) | 16.40 | 0.0003 |
| Midpiece length / midpiece width | 0.85a (1, 14) | 0.61 ± 0.08b (4, 57) | 1.38 ± 0.30a (7, 165) | 16.85 | 0.0002 |
| Head cross-sectional area (μm2) | 4.35a (1, 14) | 2.04 ± 0.22b (4, 55) | 2.19 ± 0.18b (7, 174) | 32.21 | < 0.0001 |
| Swimming speed (μm/s) | 67.34a (1, 15) | 59.96 ± 22.09a (4, 62) | 53.74 ± 6.00a (7, 104) | 3.63 | 0.16 |

All values represent mean ± SD. Brackets show the number of individuals (left) and sperm (right) used for the analyses. Different superscripts indicate significant differences in each sperm characteristic between the species (LMMs with sequential Bonferroni correction, P < 0.05). Head cross-sectional areas were calculated according to the method of [15].
