# Supplementary material for: Fertilization Modes And The Evolution of Sperm Characteristics In Marine Fishes: Paired Comparisons of The Externally And Internally Fertilizing Species
Source: Research Square preprint supplement (doi:10.21203/rs.3.rs-528835/v1), 2021-06-02
Supplement: Supplementary file 6 [file f34b4cac8850aa55a5a7c2f3.xlsx]

## Sheet: Sheet1
Additional file 2: Table S2. Measurement information for each individual fish and sperm used in this study.
Group	Species	SpeciesInd	Sex	Total_length_(mm)	Standard_length_(mm)	Bodymass_(g)	Gonad_mass_(g)	SomaW_(g)	Log_soma_mass	Log_gonad_mass	Sperm_velocity_(μm/s)	Total_sperm_length_(μm)	Head_length_(μm)	Head_width_(μm)	Midpiece_length_(μm)	Midpiece_width_(μm)	Head_length/head_width	Midpiece_length/midpiece_width	Flagella_length_(μm)	Head_length/flagella_length	LMM_regression	Relative_testes_mass
1	01_A.clarkii_	01_A.clarkii_1	M	119.77	86.61	24.8	0.071	24.729	1.393	-1.149	86.949	34.165	2.647	2.627	0.781	2.414	1.013	0.324	31.518	0.084	-0.798	-0.351
1	01_A.clarkii_	01_A.clarkii_2	M	96.94	70.46	13.2	0.04	13.16	1.119	-1.398	78.443	32.441	2.639	2.614	0.739	2.633	1.012	0.317	30.115	0.088	-0.983	-0.415
1	01_A.clarkii_	01_A.clarkii_3	M	110.07	77.9	17.5	0.052	17.448	1.242	-1.284	73.767	30.466	2.638	2.584	0.906	2.306	1.02	0.39	27.828	0.095	-0.9	-0.384
1	01_A.clarkii_	01_A.clarkii_4	M	114.68	79.95	20.9	0.048	20.852	1.319	-1.319	66.468	30.365	2.681	2.796	0.89	2.915	0.963	0.336	27.721	0.096	-0.848	-0.471
1	01_A.clarkii_	01_A.clarkii_5	M	102.56	74.31	14.7	0.038	14.662	1.166	-1.42	60.454	36.935	2.691	2.676	0.837	2.728	0.991	0.34	34.244	0.079	-0.951	-0.469
1	01_A.clarkii_	01_A.clarkii_6	M	109.97	78.77	21.9	0.047	21.853	1.34	-1.328	58.86	32.63	2.539	2.723	1.043	2.308	0.939	0.474	30.079	0.085	-0.834	-0.494
1	01_A.clarkii_	01_A.clarkii_7	M	11946	89.32	28.9	0.06	28.84	1.46	-1.222	57.26	31.708	2.703	2.669	1.035	2.875	1.016	0.364	29.032	0.092	-0.753	-0.469
1	02_C.notata_	02_C.notata_1	M	133.46	99.18	36.14	0.918	35.222	1.547	-0.037	NA	30.144	1.509	2.384	1.021	1.258	0.622	0.842	29.347	0.052	-0.695	0.658
1	02_C.notata_	02_C.notata_2	M	120.08	89.4	28.27	0.605	27.665	1.442	-0.218	NA	30.491	1.66	2.49	0.976	0.973	0.661	1.047	29.132	0.057	-0.765	0.547
1	02_C.notata_	02_C.notata_3	M	114.18	85.92	20.76	0.378	20.382	1.309	-0.423	NA	30.276	1.596	2.393	0.955	1.079	0.644	0.867	29.336	0.054	-0.855	0.432
1	02_C.notata_	02_C.notata_4	M	102.17	73.41	16.12	0.543	15.577	1.192	-0.265	NA	30.411	1.771	2.618	1.03	1.065	0.68	0.996	28.866	0.061	-0.933	0.668
1	02_C.notata_	02_C.notata_5	M	98.83	72.17	13.89	0.644	13.246	1.122	-0.191	NA	31.707	1.602	2.508	1.086	1.065	0.642	1.047	30.054	0.053	-0.981	0.79
1	02_C.notata_	02_C.notata_6	M	129.46	95.11	29.26	0.55	28.71	1.458	-0.26	78.593	32.039	1.583	2.464	1.006	1.088	0.644	0.921	30.511	0.051	-0.755	0.495
1	02_C.notata_	02_C.notata_7	M	132.65	98.15	36.63	0.418	36.212	1.559	-0.379	61.746	29.749	1.798	2.588	0.95	0.97	0.697	0.996	27.988	0.064	-0.687	0.308
1	02_C.notata_	02_C.notata_8	M	132.84	98.18	34.8	0.549	34.251	1.535	-0.26	96.154	29.794	1.557	2.372	0.843	0.914	0.66	0.955	27.818	0.056	-0.703	0.443
1	02_C.notata_	02_C.notata_9	M	129.67	96.53	30.55	0.677	29.873	1.475	-0.169	97.747	33.611	1.73	2.643	1.006	1.059	0.654	0.998	31.856	0.055	-0.743	0.574
1	02_C.notata_	02_C.notata_10	M	115.19	87.21	24.87	0.564	24.306	1.386	-0.249	NA	NA	NA	NA	NA	NA	NA	NA	NA	NA	-0.803	0.555
1	02_C.notata_	02_C.notata_11	M	126.03	93.85	31.17	0.992	30.178	1.48	-0.003	NA	NA	NA	NA	NA	NA	NA	NA	NA	NA	-0.74	0.737
1	02_C.notata_	02_C.notata_12	M	118.27	89.92	27.59	0.247	27.343	1.437	-0.607	NA	NA	NA	NA	NA	NA	NA	NA	NA	NA	-0.769	0.162
1	02_C.notata_	02_C.notata_13	M	128.55	94.41	30.45	0.232	30.218	1.48	-0.635	137.146	NA	NA	NA	NA	NA	NA	NA	NA	NA	-0.74	0.105
1	02_C.notata_	02_C.notata_14	M	122.06	88.56	25.5	0.129	25.371	1.404	-0.889	138.773	NA	NA	NA	NA	NA	NA	NA	NA	NA	-0.791	-0.099
1	02_C.notata_	02_C.notata_15	M	112.35	84.57	20.63	0.155	20.475	1.311	-0.81	112.135	NA	NA	NA	NA	NA	NA	NA	NA	NA	-0.853	0.044
1	03_P.nagasakiensis_	03_P.nagasakiensis_1	M	101.4	77.14	19.6	0.266	19.334	1.286	-0.575	121.281	23.895	1.806	2.39	0.704	1.214	0.805	0.606	22.243	0.083	-0.87	0.295
1	03_P.nagasakiensis_	03_P.nagasakiensis_2	M	94.05	73.17	15.2	0.214	14.986	1.176	-0.67	67.317	25.436	2.2	1.953	0.696	1.13	1.197	0.614	23.511	0.095	-0.945	0.275
1	03_P.nagasakiensis_	03_P.nagasakiensis_3	M	100.88	77.25	18.1	0.192	17.908	1.253	-0.717	112.996	26.994	2.177	2.009	0.824	1.392	1.156	0.585	24.432	0.088	-0.893	0.176
1	03_P.nagasakiensis_	03_P.nagasakiensis_4	M	106	83	24.9	0.41	24.49	1.389	-0.387	119.298	25.19	2.12	2.392	1.046	1.337	0.956	0.844	23.263	0.092	-0.801	0.414
1	03_P.nagasakiensis_	03_P.nagasakiensis_5	M	101.5	78	22.5	0.402	22.098	1.344	-0.396	128.168	30.052	2.228	2.511	1.114	1.414	0.925	0.794	27.695	0.08	-0.831	0.435
1	03_P.nagasakiensis_	03_P.nagasakiensis_6	M	112.5	87.5	30.1	0.458	29.642	1.472	-0.339	97.285	26.782	2.362	2.285	1.054	1.421	1.152	0.781	24.294	0.097	-0.745	0.406
1	03_P.nagasakiensis_	03_P.nagasakiensis_7	M	91	78.5	13.9	0.217	13.683	1.136	-0.664	112.495	24.773	2.159	2.595	0.732	0.914	0.919	0.731	22.348	0.097	-0.971	0.308
1	03_P.nagasakiensis_	03_P.nagasakiensis_9	M	116	89	29.9	0.42	29.48	1.47	-0.377	NA	24.136	2.126	2.076	1.01	1.415	1.04	0.721	21.951	0.098	-0.747	0.37
1	04_D.temmincki_temmincki_	04_D.temmincki_temmincki_1	M	190	145	83.7	0.396	83.304	1.921	-0.402	74.837	43.554	3.629	1.252	3.791	1.069	2.934	3.565	39.968	0.091	-0.443	0.041
1	04_D.temmincki_temmincki_	04_D.temmincki_temmincki_2	M	173	130.5	60.65	0.191	60.459	1.781	-0.719	68.93	42.173	3.704	1.329	3.47	1.208	2.826	2.961	38.572	0.096	-0.537	-0.182
1	04_D.temmincki_temmincki_	04_D.temmincki_temmincki_6	F	210	162.5	116.02	0.246	115.774	2.064	-0.609	86.845	26.782	2.362	2.285	1.054	1.421	1.152	0.781	24.294	0.09	NA	NA
1	04_D.temmincki_temmincki_	04_D.temmincki_temmincki_7	M	190.5	143	93.85	1.183	92.667	1.967	0.073	90.445	44.498	3.651	1.296	3.755	1.097	2.839	3.4	40.848	0.089	-0.412	0.485
1	04_D.temmincki_temmincki_	04_D.temmincki_temmincki_8	M	163.5	125	51.86	0.375	51.485	1.712	-0.426	84.753	42.556	3.597	1.301	2.883	1.211	2.723	2.432	38.959	0.093	-0.584	0.158
1	04_D.temmincki_temmincki_	04_D.temmincki_temmincki_9	M	215	171.5	140.49	1.341	139.149	2.143	0.127	78.43	44.51	3.579	1.27	3.283	1.159	2.879	2.858	40.858	0.088	-0.293	0.421
1	04_D.temmincki_temmincki_	04_D.temmincki_temmincki_10	M	160	131	53.52	0.878	52.642	1.721	-0.057	81.152	43.449	3.586	1.435	3.325	1.201	2.523	2.874	39.874	0.09	-0.577	0.521
1	04_D.temmincki_temmincki_	04_D.temmincki_temmincki_12	M	156	120	43.24	0.182	43.058	1.634	-0.74	105.212	44.598	3.397	1.243	3.419	1.031	2.772	3.429	41.201	0.082	-0.636	-0.104
1	04_D.temmincki_temmincki_	04_D.temmincki_temmincki_14	M	197.5	154	85.28	0.5	84.78	1.928	-0.301	91.63	43.94	3.555	1.222	3.417	0.997	2.926	3.464	40.377	0.088	-0.438	0.137
1	04_D.temmincki_temmincki_	04_D.temmincki_temmincki_15	M	192.5	150	84.01	0.34	83.67	1.923	-0.469	100.803	NA	NA	NA	NA	NA	NA	NA	NA	NA	-0.442	-0.027
2	05_D.zebra_	05_D.zebra_6	M	195	150	133.08	0.281	132.799	2.123	-0.551	33.135	22.116	2.834	2.977	1.124	1.371	0.952	0.869	19.283	0.151	-0.307	-0.244
2	05_D.zebra_	05_D.zebra_7	M	181.5	144	115.86	0.224	115.636	2.063	-0.65	36.404	26.558	2.562	2.743	0.863	0.839	0.943	1.054	24.051	0.107	-0.347	-0.303
2	05_D.zebra_	05_D.zebra_8	M	185	146	115.8	0.182	115.618	2.063	-0.74	30.06	27.46	2.707	2.739	0.985	1.251	0.985	0.882	24.739	0.111	-0.347	-0.393
2	05_D.zebra_	05_D.zebra_9	M	176	133	87.12	0.115	87.005	1.94	-0.939	30.198	27.759	2.523	2.707	1.112	1.316	0.935	0.896	25.237	0.1	-0.43	-0.509
2	05_D.zebra_	05_D.zebra_10	M	172	129	83.06	0.102	82.958	1.919	-0.991	31.71	25.918	2.729	2.831	1.045	1.93	0.956	0.612	23.19	0.119	-0.444	-0.547
2	05_D.zebra_	05_D.zebra_2019_1	M	214.5	166	157.6	0.363	157.237	2.197	-0.44	23.083	23.244	2.837	2.997	1.122	1.912	0.927	0.614	20.407	0.139	-0.257	-0.183
2	05_D.zebra_	05_D.zebra_2019_2	M	202.5	156.5	181	0.258	180.742	2.257	-0.588	23.635	26.52	2.678	2.974	1.441	1.838	0.903	0.789	23.766	0.114	-0.217	-0.371
2	06_S.cheni_	06_S.cheni_2019-1	F	235	191	212.56	32.7	179.86	2.255	1.515	NA	31.209	3.818	1.778	1.413	1.634	2.176	0.857	27.391	0.14	NA	NA
2	06_S.cheni_	06_S.cheni_2019-2	M	211.5	176.5	140.39	0.91	139.48	2.145	-0.041	75.01	31.621	3.894	1.995	1.192	1.693	1.997	0.715	27.727	0.14	-0.292	0.251
2	06_S.cheni_	06_S.cheni_2019-3	M	182	149	91.5	0.137	91.363	1.961	-0.863	44.707	32.351	4.095	2.032	1.306	1.905	2.028	0.69	28.256	0.145	-0.416	-0.447
2	06_S.cheni_	06_S.cheni_2019-4	M	175.5	143	83.5	0.098	83.402	1.921	-1.009	67.216	31.648	3.587	1.801	1.285	1.615	2.012	0.813	28.03	0.128	-0.443	-0.566
2	06_S.cheni_	06_S.cheni_2019-6	M	177	144	90.1	0.087	90.013	1.954	-1.06	42.83	31.684	4.104	1.975	1.192	1.744	2.106	0.692	27.566	0.149	-0.421	-0.639
2	06_S.cheni_	06_S.cheni_2019-9	M	233	192	181.2	0.964	180.236	2.256	-0.016	51.539	32.212	3.56	1.742	1.16	1.597	2.072	0.72	28.569	0.125	-0.217	0.201
2	06_S.cheni_	06_S.cheni_2021-1	M	189	152	98.1	0.258	97.842	1.991	-0.588	84.969	31.891	3.915	1.842	1.144	1.626	2.135	0.736	27.953	0.141	-0.396	-0.192
2	06_S.cheni_	06_S.cheni_2021-12	M	197.5	158	109.7	0.492	109.208	2.038	-0.308	NA	NA	NA	NA	NA	NA	NA	NA	NA	NA	-0.364	0.056
2	07_S.marmoratus_	07_S.marmoratus_1	M	NA	NA	NA	NA	NA	NA	NA	40.173	23.839	2.417	1.934	0.742	1.776	1.253	0.426	21.415	0.113	NA	NA
2	07_S.marmoratus_	07_S.marmoratus_2021-1	M	217	176.5	187.8	0.291	187.509	2.273	-0.536	64.001	23.965	2.521	1.898	0.518	1.344	1.344	0.382	21.444	0.118	-0.206	-0.33
2	07_S.marmoratus_	07_S.marmoratus_2021-2	M	197.5	162	107.3	0.273	107.027	2.029	-0.564	67.245	24.19	2.503	2.046	0.57	1.305	1.226	0.436	21.715	0.114	-0.37	-0.194
2	07_S.marmoratus_	07_S.marmoratus_2021-3	M	210	172	163.1	0.435	162.665	2.211	-0.362	65.756	24.369	2.462	1.987	0.612	1.246	1.249	0.512	21.907	0.112	-0.248	-0.114
2	07_S.marmoratus_	07_S.marmoratus_2021-5	M	195	156.5	111.9	0.268	111.632	2.048	-0.572	67.13	23.622	2.412	1.96	0.925	1.376	1.241	0.677	21.249	0.114	-0.357	-0.215
2	07_S.marmoratus_	07_S.marmoratus_2021-6	M	169	139	72.9	0.114	72.786	1.862	-0.943	76.273	23.53	2.625	1.864	0.992	1.329	1.414	0.766	20.916	0.126	-0.483	-0.46
3	08_A.flavidus_	08_A.flavidus_2019-1	M	137.97	128.9	3.4	0.05	3.35	0.525	-1.301	67.336	34.271	2.639	2.095	1.066	1.271	1.269	0.853	31.633	0.084	-1.383	0.082
3	09_H.dybowskii_	09_H.dybowskii_1	M	63.2	56.46	0.8	0.03	0.77	-0.114	-1.523	NA	39.446	2.45	1.175	0.575	0.886	2.11	0.646	37.119	0.066	-1.813	0.29
3	09_H.dybowskii_	09_H.dybowskii_３	M	66.25	57.68	0.942	0.02	0.922	-0.035	-1.699	48.126	NA	NA	NA	NA	NA	NA	NA	NA	NA	-1.76	0.061
3	09_H.dybowskii_	09_H.dybowskii_2017-1	M	65.3	58.12	0.907	0.024	0.883	-0.054	-1.62	72.086	40.193	2.1	1.092	0.636	1.062	1.924	0.593	38.107	0.055	-1.772	0.152
3	09_H.dybowskii_	09_H.dybowskii_2017-2	M	67.47	59.87	1.022	0.026	0.996	-0.002	-1.585	43.867	39.745	2.187	1.097	0.702	1.015	2.027	0.699	37.557	0.058	-1.737	0.152
3	09_H.dybowskii_	09_H.dybowskii_2017-3	M	75.15	67.15	1.396	0.043	1.353	0.131	-1.367	75.755	40.54	2.239	1.259	0.541	1.06	1.762	0.519	38.304	0.058	-1.648	0.281
3	10_A.japonicus_	10_A.japonicus_1	M	117	107.5	2.951	0.051	2.9	0.462	-1.292	45.94	38.976	2.63	1.138	1.737	1.225	2.333	1.45	36.373	0.072	29.186	9.79
3	10_A.japonicus_	10_A.japonicus_2	M	109.84	101.48	2.429	0.039	2.39	0.378	-1.409	49.552	37.866	2.418	1.243	1.476	1.242	1.96	1.218	35.531	0.068	31.617	6.249
3	10_A.japonicus_	10_A.japonicus_3	F	148.39	138.34	6.66	1.061	5.599	0.748	0.026	73.767	37.139	2.182	1.146	0.994	1.024	1.898	0.993	34.957	0.062	NA	NA
3	10_A.japonicus_	10_A.japonicus_4	M	111.37	102.24	2.51	0.053	2.457	0.39	-1.276	60.131	37.903	2.311	1.127	2.168	1.156	2.064	1.89	35.591	0.065	47.917	-10.778
3	10_A.japonicus_	10_A.japonicus_5	M	112.78	103.06	2.7	0.042	2.658	0.425	-1.377	53.954	36.647	2.277	1.128	1.664	1.059	2.034	1.63	34.35	0.066	38.738	-0.835
3	10_A.japonicus_	10_A.japonicus_6	M	114.07	105.32	2.91	0.037	2.873	0.458	-1.432	54.628	37.959	2.546	1.208	1.641	1.338	2.129	1.249	35.423	0.072	34.58	2.067
3	10_A.japonicus_	10_A.japonicus_7	M	111.73	103.2	2.48	0.026	2.454	0.39	-1.585	62.553	37.107	2.348	1.192	1.459	1.182	1.979	1.223	34.72	0.069	35.034	2.925
