# Supplementary material for: Fertilization Modes And The Evolution of Sperm Characteristics In Marine Fishes: Paired Comparisons of The Externally And Internally Fertilizing Species
Source: Research Square preprint supplement (doi:10.21203/rs.3.rs-528835/v1), 2021-06-02
Supplement: Supplementary file 7 [file 0a9ec01e83983c97706c8ef6.xlsx]

## Sheet: Sheet1
Additional file 3: Table S3. Measurement information for each individual fish used for relative genital length.
Group	Species	IndID	Genital_length_(mm)	Total_length_(mm)	Standerd_length_(mm)	Log_genital_length	Log_soma_length	LMM_regression	Relative_genital_length
1	01_A.clarkii_	01_A.clarkii_1	0.479	119.77	86.61	-0.319664	1.93757	-0.0521148	-0.26755
1	01_A.clarkii_	01_A.clarkii_2	0.107	96.94	70.46	-0.970616	1.84794	-0.312548	-0.658068
1	01_A.clarkii_	01_A.clarkii_3	0.241	110.07	77.9	-0.617983	1.89154	-0.18587	-0.432113
1	01_A.clarkii_	01_A.clarkii_4	0.337	114.68	79.95	-0.47237	1.90282	-0.15309	-0.31928
1	02_C.notata_	02_C.notata_13	0.612	128.55	94.41	-0.213249	1.97502	0.0567073	-0.269956
1	02_C.notata_	02_C.notata_14	0.483	122.06	88.56	-0.316053	1.94724	-0.024017	-0.292036
1	02_C.notata_	02_C.notata_15	0.512	112.35	84.57	-0.29073	1.92722	-0.0821948	-0.208535
1	03_P.nagasakiensis_	03_P.nagasakiensis_1	2.46	101.4	77.14	0.390935	1.88728	-0.198243	0.589178
1	03_P.nagasakiensis_	03_P.nagasakiensis_2	3.356	94.05	73.17	0.525822	1.86433	-0.264921	0.790743
1	03_P.nagasakiensis_	03_P.nagasakiensis_3	2.127	100.88	77.25	0.327767	1.8879	-0.196445	0.524212
1	04_D.temmincki_temmincki_	04_D.temmincki_temmincki_10	2.37	160	131	0.374748	2.11727	0.470067	-0.0953186
1	04_D.temmincki_temmincki_	04_D.temmincki_temmincki_12	0.949	156	120	-0.0227338	2.07918	0.359385	-0.382119
1	04_D.temmincki_temmincki_	04_D.temmincki_temmincki_13	2.936	142	119	0.467756	2.07555	0.348824	0.118932
1	04_D.temmincki_temmincki_	04_D.temmincki_temmincki_15	1.584	192.5	150	0.199755	2.17609	0.640986	-0.441231
1	04_D.temmincki_temmincki_	04_D.temmincki_temmincki_17	1.302	155	117	0.114611	2.06819	0.327434	-0.212823
2	05_D.zebra_	05_D.zebra_2019-2	0.396	202.5	156.5	-0.402305	2.19451	0.69452	-1.09682
2	05_D.zebra_	05_D.zebra_2020-1	0.526	159.357	126.146	-0.279014	2.10087	0.422418	-0.701432
2	06_S.cheni_	06_S.cheni_3	1.614	182	149	0.207904	2.17319	0.632545	-0.424641
2	06_S.cheni_	06_S.cheni_4	1.715	175.5	143	0.234264	2.15534	0.580675	-0.346411
2	06_S.cheni_	06_S.cheni_6	1.377	177	144	0.138934	2.15836	0.58947	-0.450536
2	06_S.cheni_	06_S.cheni_9	4.674	233	192	0.669689	2.2833	0.952517	-0.282828
2	06_S.cheni_	06_S.cheni_2021-1	3.004	189	152	0.4777	2.18184	0.657701	-0.180001
2	06_S.cheni_	06_S.cheni_2021-12	3.23	197.5	158	0.509203	2.19866	0.706558	-0.197355
2	07_S.marmoratus_	07_S.marmoratus_2021-1	6.127	217	176.5	0.787248	2.24674	0.846291	-0.0590429
2	07_S.marmoratus_	07_S.marmoratus_2021-2	4.751	197.5	162	0.676785	2.20952	0.738109	-0.0613237
2	07_S.marmoratus_	07_S.marmoratus_2021-3	5.251	210	172	0.720242	2.23553	0.813699	-0.0934565
2	07_S.marmoratus_	07_S.marmoratus_2021-5	4.042	195	156.5	0.606596	2.19451	0.69452	-0.0879235
2	07_S.marmoratus_	07_S.marmoratus_2021-6	4.086	169	139	0.611298	2.14301	0.544872	0.066426
2	07_S.marmoratus_	07_S.marmoratus_2021-7	3.186	176	145	0.503246	2.16137	0.598203	-0.0949574
3	09_H.dybowskii_	09_H.dybowskii_1	0.118	63.2	56.46	-0.928118	1.75174	-0.592091	-0.336027
3	10_A.japonicus_	10_A.japonicus_15	15.036	111.6	103.58	1.17713	2.01528	0.173689	1.00344
3	10_A.japonicus_	10_A.japonicus_16	14.365	110.84	101.93	1.15731	2.0083	0.153424	1.00388
3	10_A.japonicus_	10_A.japonicus_17	16.795	116.25	108.23	1.22518	2.03435	0.229107	0.996073
3	10_A.japonicus_	10_A.japonicus_18	14.569	112.2	103.89	1.16343	2.01657	0.17746	0.98597
3	10_A.japonicus_	10_A.japonicus_19	15.739	114.74	106.26	1.19698	2.02637	0.205925	0.991052
3	10_A.japonicus_	10_A.japonicus_20	12.818	110.91	102.54	1.10782	2.01089	0.160954	0.946866
