# Supplementary material for: Fertilization Modes And The Evolution of Sperm Characteristics In Marine Fishes: Paired Comparisons of The Externally And Internally Fertilizing Species
Source: Research Square preprint supplement (doi:10.21203/rs.3.rs-528835/v1), 2021-06-02
Supplement: Supplementary file 8 [file 810256648b8a2bfa263d5e2d.docx]

**Additional file 5: Table S5** Summary of sperm characteristics in Group II.

**Table S5** Summary of sperm characteristics in Group II.

| Sperm characteristics | *Dendrochirus zebra* | *Sebastes cheni* | *Sebastiscus marmoratus* | Statistics | |
| --- | --- | --- | --- | --- | --- |
| χ22 | P |
| Total length (μm) | 25.65 ± 2.15a (7, 117) | 31.8 ± 0.39b (6, 89) | 23.92 ± 0.32c (7, 88) | 42.60 | < 0.0001 |
| Flagellum length (μm) | 22.95 ± 2.25a (7, 114) | 27.93 ± 0.4b (6, 82) | 21.44 ± 0.35a (7, 83) | 35.05 | < 0.0001 |
| Head length (μm) | 2.7 ± 0.12a (7, 117) | 3.85 ± 0.22b (6, 83) | 2.49 ± 0.08c (7, 85) | 59.35 | < 0.0001 |
| Head width (μm) | 2.85 ± 0.13a (7, 114) | 1.88 ± 0.12b (6, 85) | 1.95 ± 0.06b (7, 87) | 60.96 | < 0.0001 |
| Midpiece length (μm) | 1.10 ± 0.18a (7, 96) | 1.24 ± 0.10a (6, 82) | 0.73 ± 0.20b (7, 87) | 21.90 | 0.007 |
| Midpiece width (μm) | 1.49 ± 0.41 (7, 96) | 1.69 ± 0.11 (6, 82) | 1.40 ± 0.19 (7, 83) | 4.01 | 0.134 |
| Head length / head width | 0.94 ± 0.03a (7, 111) | 2.08 ± 0.07b (6, 82) | 1.29 ± 0.07c (7, 84) | 88.60 | < 0.0001 |
| Midpiece length / midpiece width | 0.82 ± 0.16a (7, 92) | 0.75 ± 0.06a (6, 80) | 0.53 ± 0.15b (7, 82) | 12.89 | 0.002 |
| Swimming speed (μm/s) | 29.75 ± 4.86a (7, 184) | 63.43 ± 12.16b (6, 119) | 61.05 ± 17.29b (6, 136) | 14.93 | 0.0006 |

All values represent mean ± SD. Brackets show the number of individuals (left) and sperm (right) used for the analyses. Different superscripts indicate significant differences in each sperm characteristic between the species (LMMs with sequential Bonferroni correction, P < 0.05).
